# Supplementary material for: Cost effective urea combustion derived mesoporous-Li2MnSiO4as a novel material for supercapacitors
Source: Royal Society of Chemistry journal article supplement (doi:10.1039/c5ra02207j), 2015-01-01
Supplement: c5ra02207j1.pdf [file c5ra02207j1.pdf]

### Electronic Supplementary Information

#### **Cost effective urea combustion derived mesoporous- $\text{Li}_2\text{MnSiO}_4$ as a novel material for supercapacitor**

Purna Chaturvedi,<sup>a</sup> Amit Kumar,<sup>a</sup> Anjan Sil,<sup>b</sup> and Yogesh Sharma<sup>a,\*</sup>

<sup>a</sup>Energy Storage Laboratory, Department of Applied Science & Engineering, IIT Roorkee Saharanpur Campus, Saharanpur-247001

<sup>b</sup>Department of Metallurgical and Materials Engineering, IIT Roorkee, Roorkee-247667

\*Corresponding author: ykspfpt@iitr.ac.in

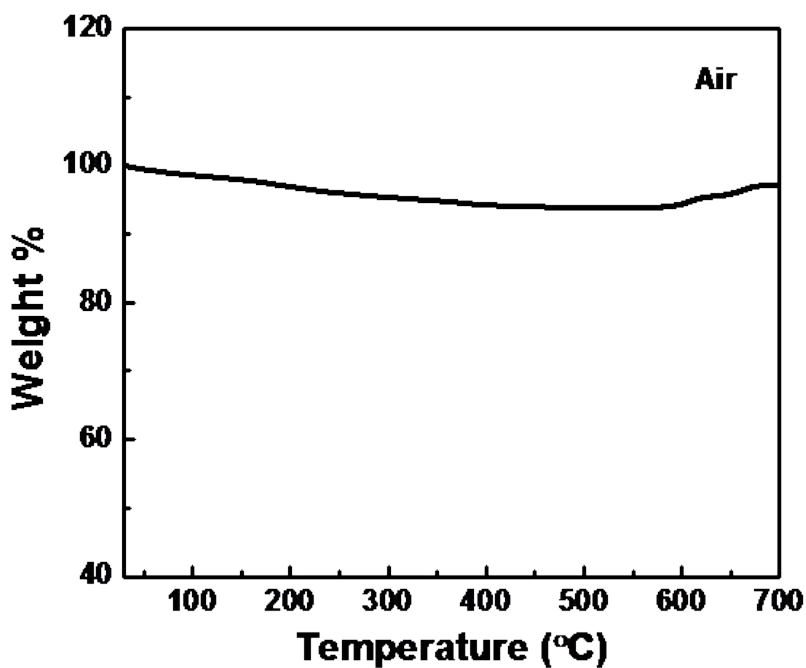

**Figure S1.** TG plot of  $\text{Li}_2\text{MnSiO}_4$  conducted in air between room temperature (26 °C) to 700 °C.

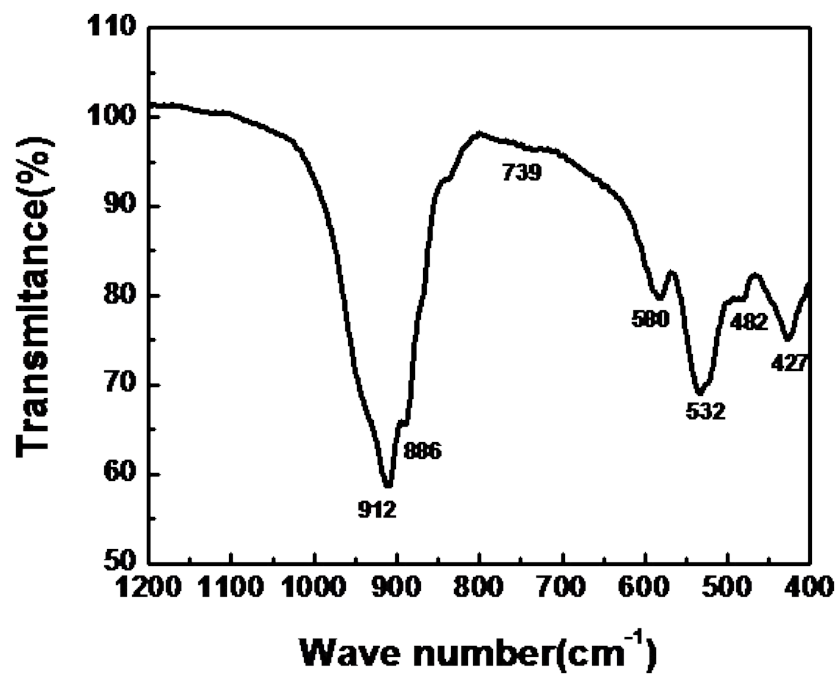

Figure S2. FTIR spectra of  $\text{Li}_2\text{MnSiO}_4$ .

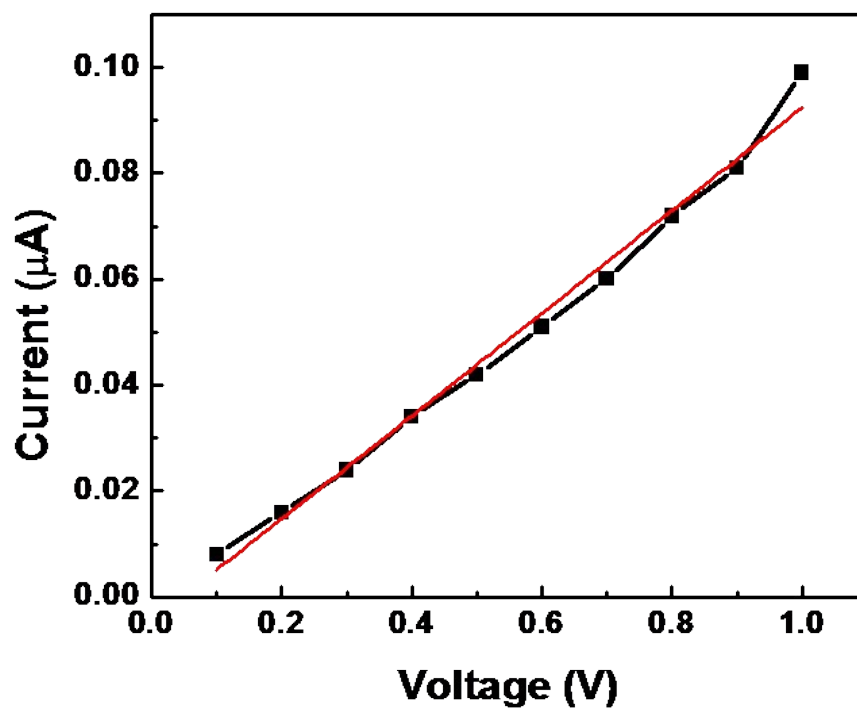

Figure S3. I-V characteristics of  $\text{Li}_2\text{MnSiO}_4$  in the potential range of 0.1 - 1 V at room temperature.
